# Supplementary material
Source: MDPI journal article supplement (https://www.mdpi.com/2076-3417/10/18/6465)
Supplement: s1 [file s1]

# Folic Acid/Methotrexate Functionalized Mesoporous Silica Nanoflakes from Different Supports: Comparative Study

Martyna Trukawka, Krzysztof Cendrowski, Wojciech Konicki and Ewa Mijowska

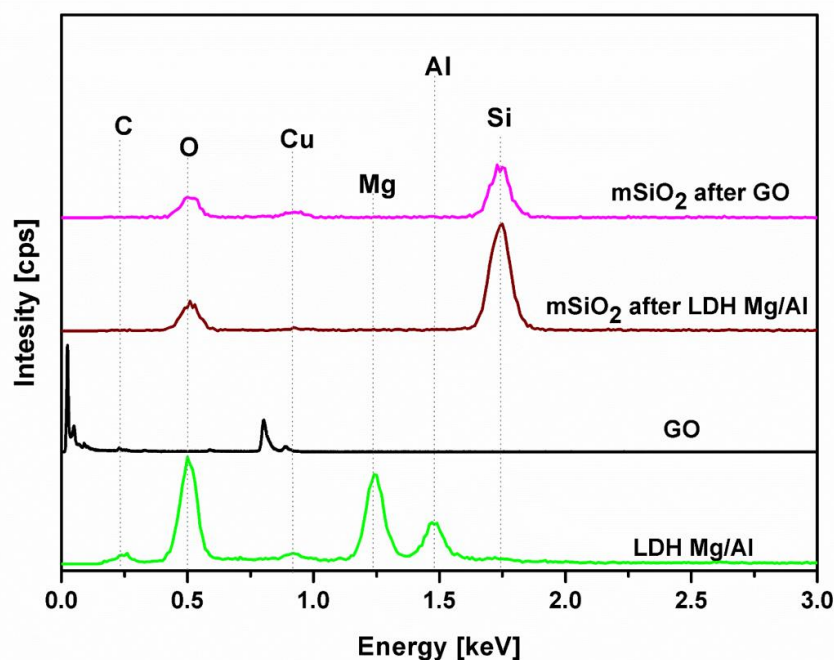

**Figure S1.** X-ray dispersion spectroscopy (EDX) elemental spectra of silica flakes and the templates.

Figure S2 presents XRD patterns of GO, mSiO<sub>2</sub> after GO, LDH Mg/Al, and mSiO<sub>2</sub> after LDH Mg/Al. The GO pattern exhibits a strong peak at  $2\theta=11.28^\circ$  corresponding to the (002) plane of GO, which confirms the successful preparation of GO from graphite powder through oxidation by the modified Hummers method [1]. The LDH Mg/Al pattern exhibits a series of reflections at  $11.65^\circ$ ,  $23.32^\circ$ ,  $34.89^\circ$ ,  $39.44^\circ$ ,  $46.75^\circ$ ,  $60.73^\circ$ , and  $62.10^\circ$ . Sharp, intense peaks at low diffraction angles (peaks close to  $11.71^\circ$ ,  $23.53^\circ$ , and  $34.73^\circ$ ) were ascribed to diffraction by basal planes (003), (006), and (009), respectively [2]. The pattern of the mSiO<sub>2</sub> shows the broad peak at  $22^\circ$ , indicating that the flakes are composed of amorphous silica [3]. The lack of other diffraction peaks indicates the efficient removal of the templates from the silica flakes.

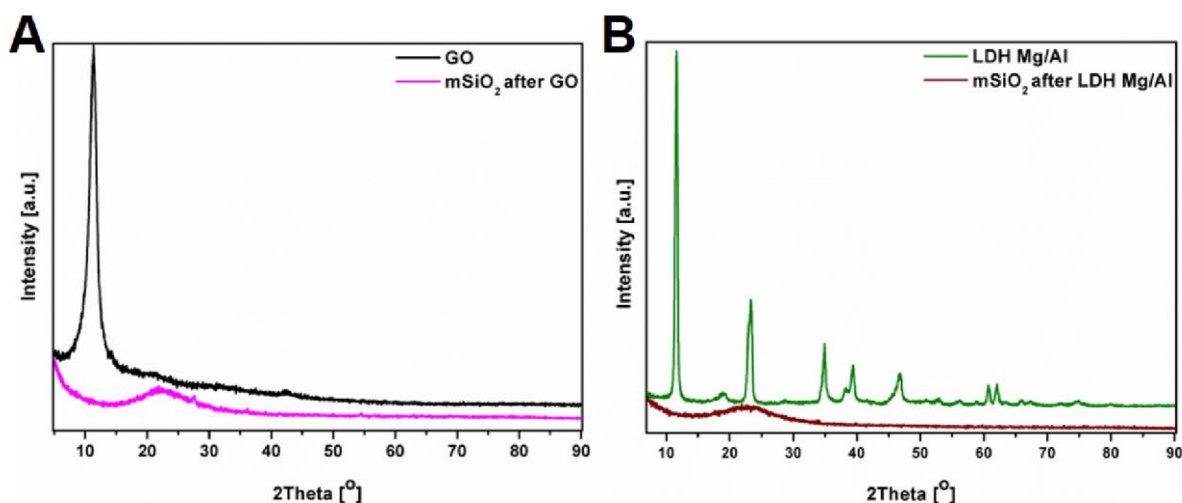

**Figure S2.** XRD patterns of mSiO<sub>2</sub> after GO (A) and GO and mSiO<sub>2</sub> after LDH Mg/Al and LDH Mg/Al (B).

In Raman spectrum of graphene oxide (Figure S3A), two typical modes are observed: a D-band at 1332 cm<sup>-1</sup> and a G-band at 1612 cm<sup>-1</sup>. The G-band is characteristic for graphitic sheets, corresponding to a well-defined sp<sup>2</sup> carbon-type structure, whereas the D-band can be attributed to the presence of defects within the graphitic structure [4]. In the case of silica flakes, their Raman spectra are dominated by two spectral regions. The band in the range of 440–530 cm<sup>-1</sup> involves motions of O in Si–O–Si symmetric stretching–bending modes. The peaks above 600 cm<sup>-1</sup> are correlated to the Si–O stretching mode [5]. In the spectra of silica flakes, there are no peaks that are characteristic for them. This indicates the efficient removal of the matrix. The Raman spectrum of LDH Mg/Al exhibits several strong bands (Figure S3 B). The band at 548 cm<sup>-1</sup> is from the stretching vibrations of Al–O–Mg bands, whereas the band around 483 cm<sup>-1</sup> was assigned to hydroxyl groups [6]. The strongest peak at 155 cm<sup>-1</sup> is possibly due to the hydrogen bonding and asymmetric stretching vibrations in LDH Mg/Al layers and interlayer water molecules [7,8]. The signal at 1052 cm<sup>-1</sup> was identified as the Al–O bending mode [9]. Raman peaks around 1315 cm<sup>-1</sup> are associated to the characteristics peaks of Mg–O [10].

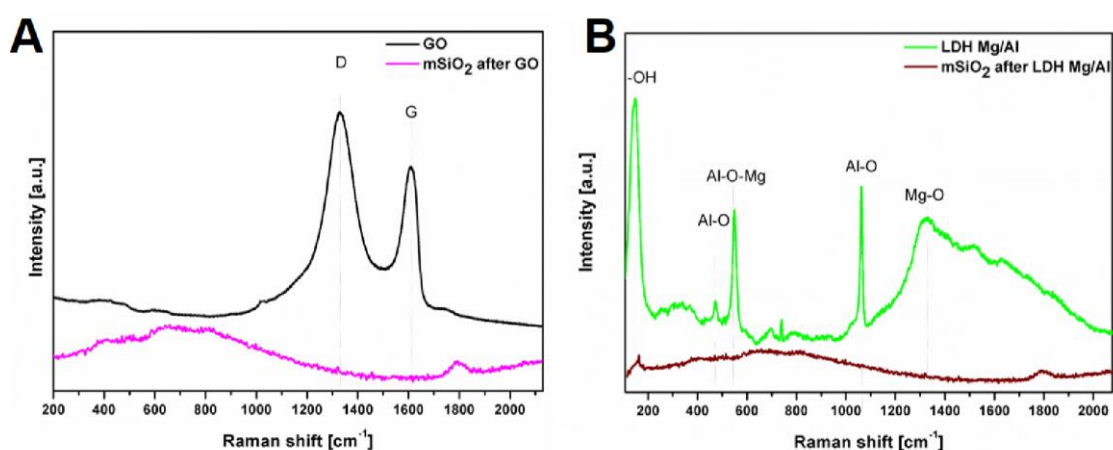

**Figure S3.** Raman spectra of mSiO<sub>2</sub> after GO (A) and GO and mSiO<sub>2</sub> after LDH Mg/Al and LDH Mg/Al (B).

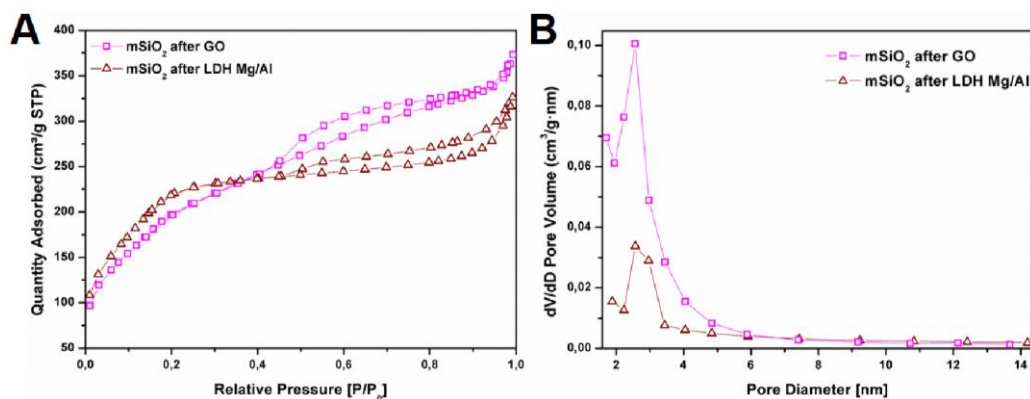

**Figure S4.** BET isotherms (A) and diagrams of pore diameter distribution (B) of mSiO<sub>2</sub> after GO and mSiO<sub>2</sub> after LDH Mg/Al.

The thermogravimetric analysis (TGA) of silica flakes functionalized with folic acid is presented in Figure S5. In both samples, there is a weight loss assigned to the removal of moisture (up to 100 °C). Folic acid undergoes combustion in the range between 100 and 600 °C. It was calculated that the sample based on LDH Mg/Al loaded 20 wt % of folic acid, while the silica formed on GO contained 23 wt % of folic acid.

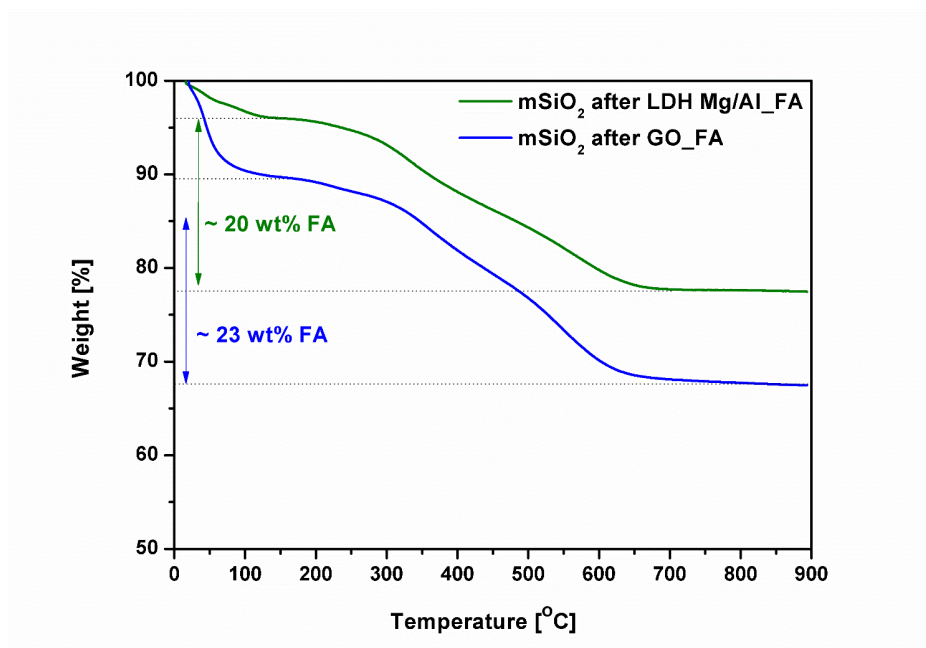

**Figure S5.** Thermogravimetric analysis of silica flakes functionalized with folic acid.

## References

1. Roy, I.; Rana, D.; Sarkar, G.; Bhattacharyya, A.; Saha, NR.; Mondal, S.; Pattanayak, S.; Chattopadhyay, S.; Chattopadhyay, D Physical and electrochemical characterization of reduced graphene oxide/silver nanocomposites synthesized by adopting a green approach. *RSC Advances* **2015**, *5*, 25357–25364.
2. Rezaei, B.; Heidarbeigy, M.; Ensafi, AA.; Dinari, M.; Electrochemical Determination of Papaverine on Mg-Al Layered Double Hydroxide/ Graphene Oxide and CNT Modified Carbon Paste Electrode. *IEEE Sens. J.* **2016**, *16*, 3496–3503.
3. Huo, C.; Ouyang, J.; Yang, H.; CuO nanoparticles encapsulated inside Al-MCM-41 mesoporous materials via direct synthetic route. *Sci. Rep.* **2015**, *4*, 3682–3690.
4. Johra, FT.; Lee, J-W.; Jung, WG.; Facile and safe graphene preparation on solution based platform. *J. Ind. Eng. Chem.* **2014**, *20*, 2883–2887.

5. Kingam, KJ.; Hemley, RJ.; Raman spectroscopic study of microcrystalline silica. *Am. Miner.* **1994**, *79*, 269–273.
6. Mrózeka, O.; Ecorchard, P.; Vomáčka, P.; Ederer, J.; Smržová, D.; Šrámová Slušná, M.; Machálková, A.; Nevoralová, M.; Beneš, H Mg-Al-La LDH-MnFe<sub>2</sub>O<sub>4</sub> hybrid material for facile removal of anionic dyes from aqueous solutions. *Appl. Clay Sci.* **2019**, *169*, 1–9.
7. Islam, MR.; Guo, Z.; Rutman, D.; Benson, TJ.; Immobilization of triazabicyclodecene in surfactant modified Mg/Al layered double hydroxides. *RSC Adv.* **2013**, *3*, 24247.
8. Burrueco, MI.; Mora, M.; Jiménez-Sanchidrián, C.; Ruiz, JR.; Raman microspectroscopy of hydrotalcite-like compounds modified with sulphate and sulphonate organic anions. *J. Mol. Struct.* **2013**, *1034*, 38–42.
9. Sieber, T.; Duche, J.; Rietig, A.; Langner, T.; Acker, J; Recovery of Li(Ni<sub>0.33</sub>Mn<sub>0.33</sub>Co<sub>0.33</sub>)O<sub>2</sub> from Lithium-Ion Battery Cathodes: Aspects of Degradation. *Nanomat.* **2019**, *9*, 246–260.
10. Akram, MW.; Fakhar-e-Alam, M.; Butt, AR.; Munir, T.; Ali, A.; Alimgeer, KS.; Mehmood-ur-Rehman, K.; Iqbal, S.; Ali, S.; Ikram, M.; Amin, N.; Wang, ZM.; Magnesium Oxide in Nanodimension: Model for MRI and Multimodal Therapy. *J. Nanomater.* **2018**, 1–12.

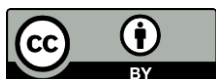

© 2020 by the authors. Submitted for possible open access publication under the terms and conditions of the Creative Commons Attribution (CC BY) license (<http://creativecommons.org/licenses/by/4.0/>).
